# Supplementary material for: Nanostructured porous manganese carbonate spheres with capacitive effects on the high lithium storage capability
Source: Royal Society of Chemistry journal article supplement (doi:10.1039/c5nr01843a), 2015-01-01
Supplement: c5nr01843a1.pdf [file c5nr01843a1.pdf]

Electronic Supplementary Information (ESI) for nanoscale

This journal is © The Royal Society of Chemistry 2014

### Supporting Information

## **Nanostructured porous manganese carbonate spheres with capacitive effects on the high lithium storage capability**

Wenpei Kang<sup>a,b</sup>, Denis Yau Wai Yu<sup>a,c</sup>, Wenyue Li<sup>d,a,b</sup>, Zhenyu Zhang<sup>a,b</sup>, Xia Yang<sup>a,b</sup>, Tsz-Wai Ng<sup>a,b</sup>, Rujia Zou<sup>a,b</sup>, Yongbing Tang<sup>d,a\*</sup>, Wenjun Zhang<sup>a,b</sup> and Chun-Sing Lee<sup>a,b\*</sup>

a Center of Super-Diamond and Advanced Films (COSDAF), City University of Hong Kong, Hong Kong SAR, People's Republic of China.

b Department of Physics and Materials Science, City University of Hong Kong, Hong Kong SAR, People's Republic of China.

c School of Energy and Environment, City University of Hong Kong, Hong Kong SAR, People's Republic of China.

d Functional Thin Films Research Center, Shenzhen Institutes of Advanced Technology, Chinese Academy of Sciences, People's Republic of China.

E-mail: [tangyb@siat.ac.cn](mailto:tangyb@siat.ac.cn); [apcslee@cityu.edu.hk](mailto:apcslee@cityu.edu.hk); Tel: +852-34427826

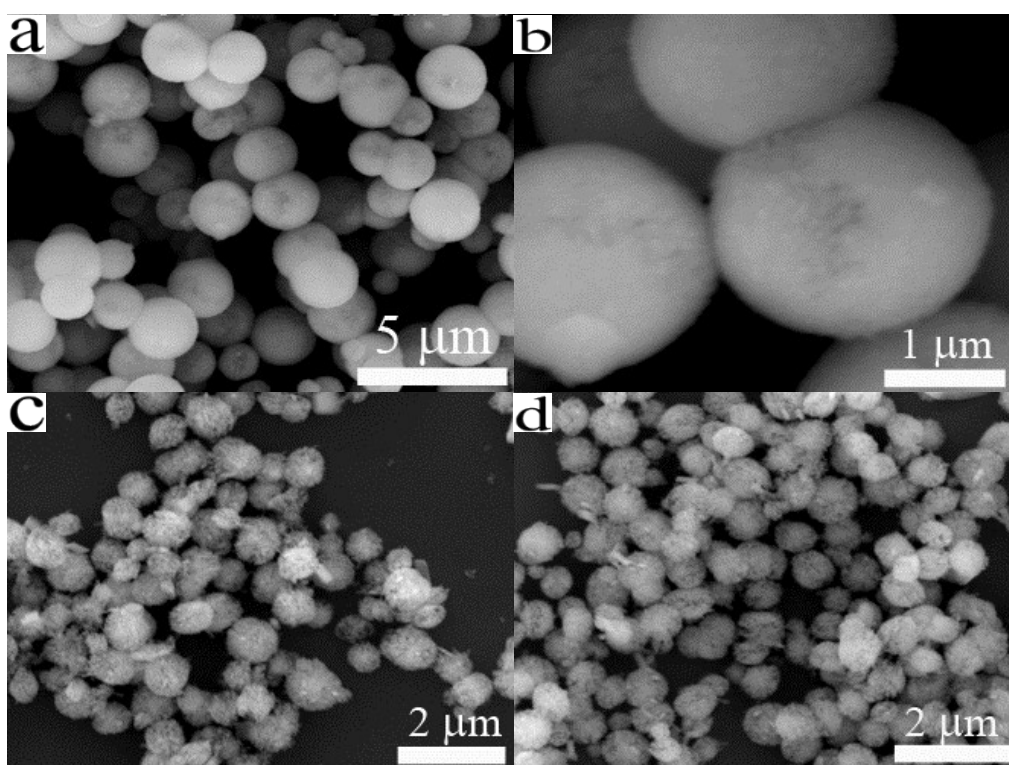

Fig. S1. SEM images of MnCO<sub>3</sub> obtained from (a, b) hydrothermal reaction; solvothermal reaction with (c) PVP and (d) acid ascorbate.

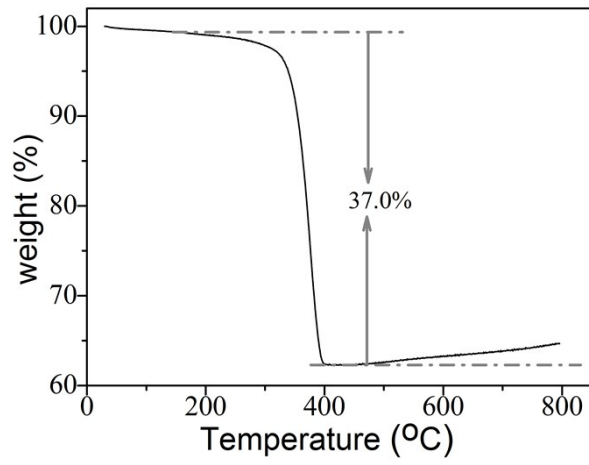

Fig. S2. Thermogravimetric measurement of p-MnCO<sub>3</sub> nanostructures. It indicates that MnCO<sub>3</sub> has a good thermal stability below 280°C.

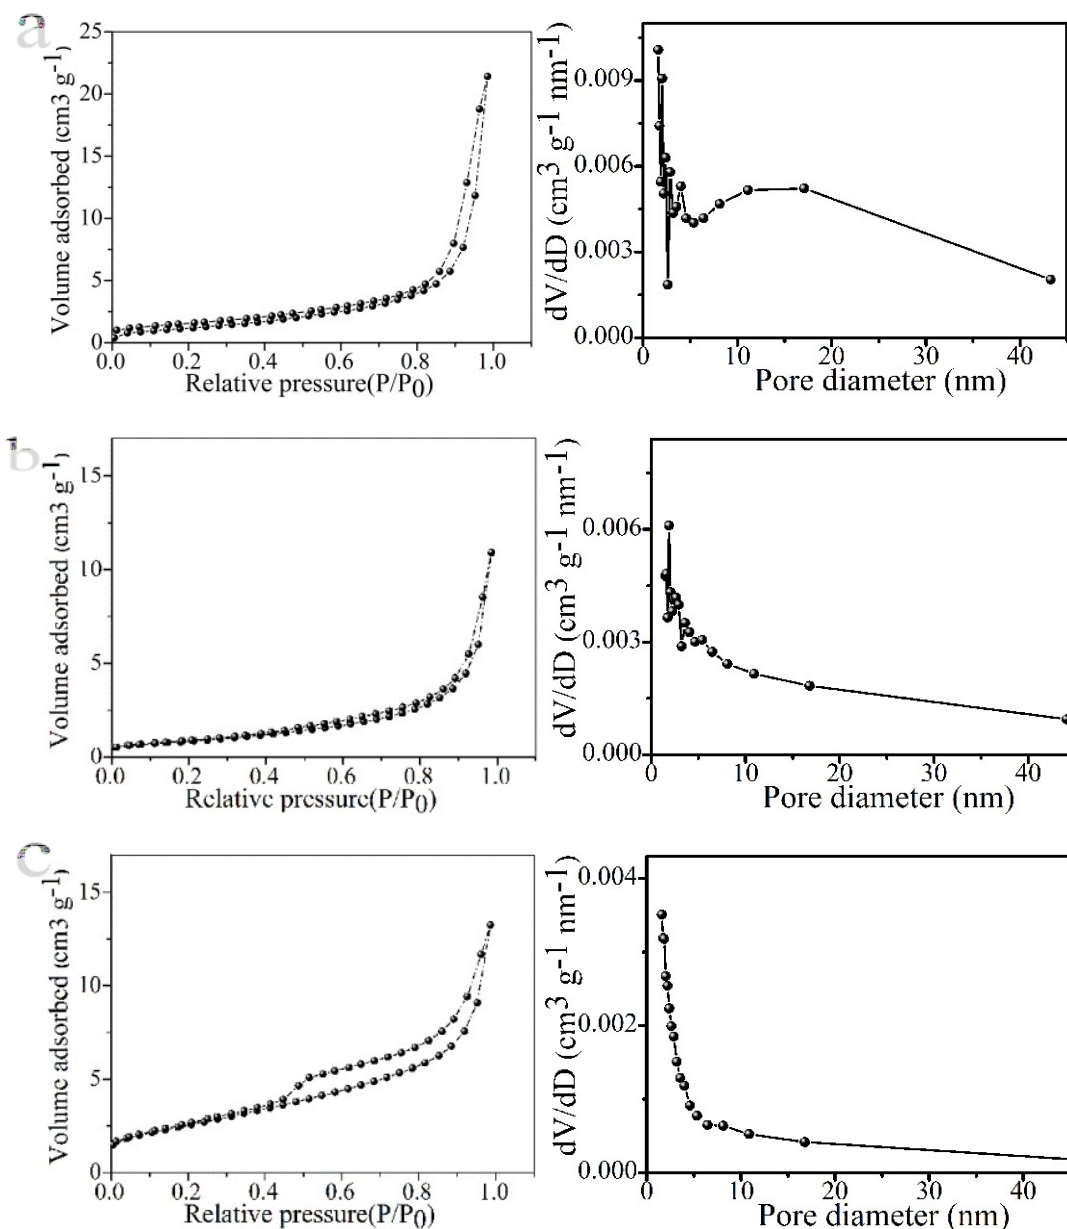

Fig. S3. N<sub>2</sub> adsorption–desorption isotherms curves (left) and pore size distribution (right) for (a) p-MnCO<sub>3</sub>, (b) MnCO<sub>3</sub>-R3 and (c) MnCO<sub>3</sub>-R4. BET analysis of p-MnCO<sub>3</sub> gives a specific surface area of 25.4 m<sup>2</sup> g<sup>-1</sup>, a pore volume of 0.188 cm<sup>3</sup> g<sup>-1</sup> and average pore diameter of 3.2 nm. In comparison, the micro-size solid particle (MnCO<sub>3</sub>-R3) gives a specific surface area of 17.2 m<sup>2</sup> g<sup>-1</sup> and a pore volume of 0.09 cm<sup>3</sup> g<sup>-1</sup> and average pore diameter of 3.7 nm. And the commercial sample (MnCO<sub>3</sub>-R4) has BET areas of 11.3 m<sup>2</sup> g<sup>-1</sup> and pore volume of 0.023 cm<sup>3</sup> g<sup>-1</sup>.

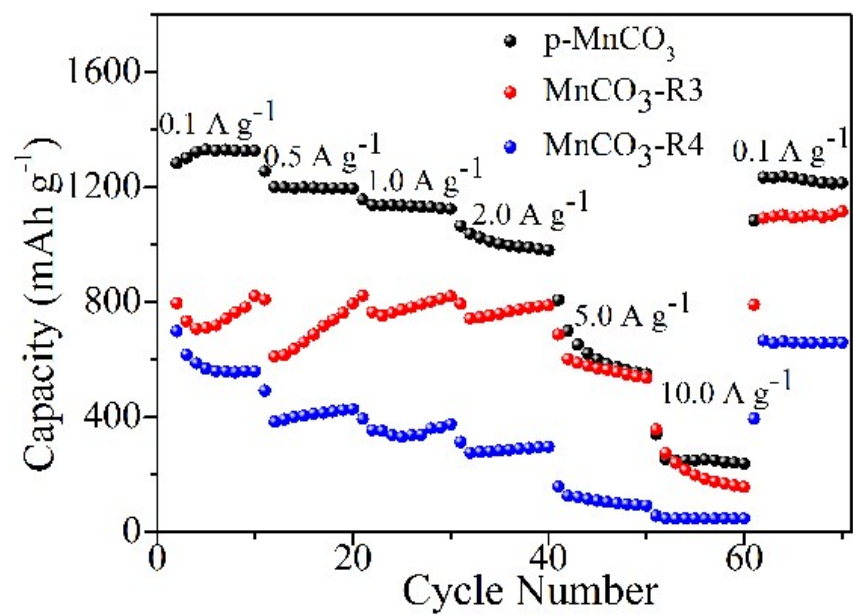

Fig. S4. Rate capabilities of different MnCO<sub>3</sub> samples.

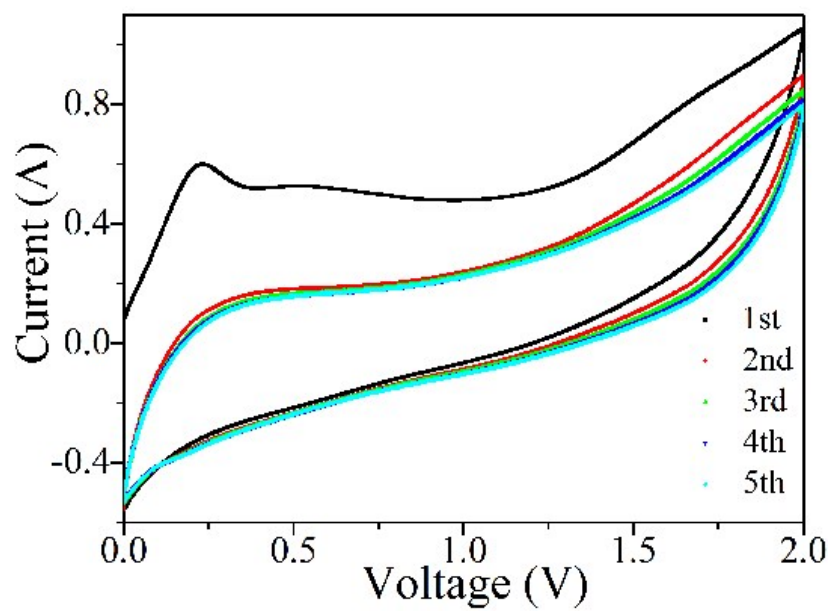

Fig. S5. CV curves for the symmetric supercapacitor with MnCO<sub>3</sub>-MnCO<sub>3</sub> electrodes at a scan rate of 50 mV s<sup>-1</sup>.

Table S1. A summary of the lithium storage capabilities of as-prepared porous MnCO<sub>3</sub> sphere in comparison with other high-performance anode materials reported in the literature.

| <b>Material</b>         | <b>Residual capacity<br/>(mAh g<sup>-1</sup>)</b> | <b>Current<br/>(mA g<sup>-1</sup>) or<br/>C</b> | <b>Ref</b>                                      |
|-------------------------|---------------------------------------------------|-------------------------------------------------|-------------------------------------------------|
| <b>MnCO<sub>3</sub></b> | <b>1049/200th cycle<br/>507/2000th cycle</b>      | <b>1000<br/>5000</b>                            | <b>This Work</b>                                |
| Si/C                    | 1160/1000th cycle                                 | 2100                                            | <i>Nature Nanotech</i> , 2014, <b>9</b> ,187    |
| Si-PANi                 | 550/4000th cycle                                  | 6000                                            | <i>Nature Commun</i> , 2013, <b>4</b> ,<br>1943 |
| Si-CNT                  | ~1300/100th cycle                                 | 800                                             | <i>Nano Energy</i> , 2013, <b>2</b> , 138       |
| Ge                      | 1246/200th cycle                                  | 1C                                              | <i>Chem. Mater.</i> , 2014, <b>26</b> , 5683    |
| Ge                      | 993/600th cycle<br>680/300th cycle                | 1C<br>2C                                        | <i>Chem. Mater.</i> , 2014, <b>26</b> , 2172    |
| Ge                      | 888/1100th cycle                                  | C/2                                             | <i>Nano Lett.</i> , 2014, <b>14</b> , 716       |
| SnO <sub>2</sub> -PPy   | 448/100th cycle                                   | 0.1C                                            | <i>Nano Energy</i> , 2014, <b>6</b> , 73        |
| SnO <sub>x</sub> /C     | 608/200th cycle                                   | 500                                             | <i>Adv. Mater.</i> , 2014, <b>26</b> , 3943     |
| Sn/C                    | 1089/100th cycle<br>657/1000th cycle              | 0.2C<br>2C                                      | <i>ACS Nano</i> , 2014, <b>8</b> , 1728         |

Table S2 A summary of the lithium storage capabilities of as-prepared porous MnCO<sub>3</sub> sphere in comparison with other oxysalt anode materials reported in the literature.

| <b>Material</b>                                   | <b>Shape</b>            | <b>Residual capacity (mAh g<sup>-1</sup>)</b> | <b>Current (mA g<sup>-1</sup>) or C</b> | <b>Ref</b>                                                  |
|---------------------------------------------------|-------------------------|-----------------------------------------------|-----------------------------------------|-------------------------------------------------------------|
| <b>MnCO<sub>3</sub></b>                           | <b>Porous sphere</b>    | <b>1049/200th cycle<br/>507/2000th cycle</b>  | <b>1000<br/>5000</b>                    | <b>This work</b>                                            |
| CoCO <sub>3</sub> /GNS                            | cubes                   | 744/100th cycle<br>680/100th cycle            | 200<br>500                              | <i>Nano Energy</i> , 2013, <b>2</b> , 276                   |
| CoCO <sub>3</sub> -<br>polypyrrole                | urchin-like structure   | 811.2/100th cycle<br>559/100th cycle          | 1000<br>5000                            | <i>J. Mater. Chem. A</i> , 2013, <b>1</b> , 11200           |
| CuC <sub>2</sub> O <sub>4</sub> xH <sub>2</sub> O | Cylinder-like structure | 970/100th cycle<br>809/100th cycle            | 200<br>500                              | <i>J. Power Sources</i> , 2013, <b>238</b> , 203            |
| FeC <sub>2</sub> O <sub>4</sub>                   | Elongated-shape         | >400/75th cycle                               | 2C                                      | <i>Inorg. Chem.</i> , 2008, <b>47</b> , 10366               |
| MnCO <sub>3</sub>                                 | Rhombohedron            | >466/25th cycle                               | C/4                                     | <i>Electrochem. Commun.</i> 2007, <b>9</b> , 1744           |
| CoC <sub>2</sub> O <sub>4</sub>                   | Nanoribbon              | <700/70th cycle                               | 2C                                      | <i>Chem. Mater.</i> , 2009, <b>21</b> , 1834                |
| FeCO <sub>3</sub>                                 | Cubes                   | 812/120th cycle                               | 1000                                    | <i>J. Power Sources</i> , 2014, <b>253</b> , 251            |
| FeCO <sub>3</sub>                                 | Hollow Microspheres     | 710/200th cycle                               | 200                                     | <i>ACS Appl. Mater. Interfaces</i> , 2013, <b>5</b> , 11212 |
